# Supplementary material
Source: PubMed Central journal article supplement (PMC4054175)
Supplement: JB.01540-14_zjb999093214so1.pdf [file JB.01540-14_zjb999093214so1.pdf]

## SUPPLEMENTAL MATERIAL

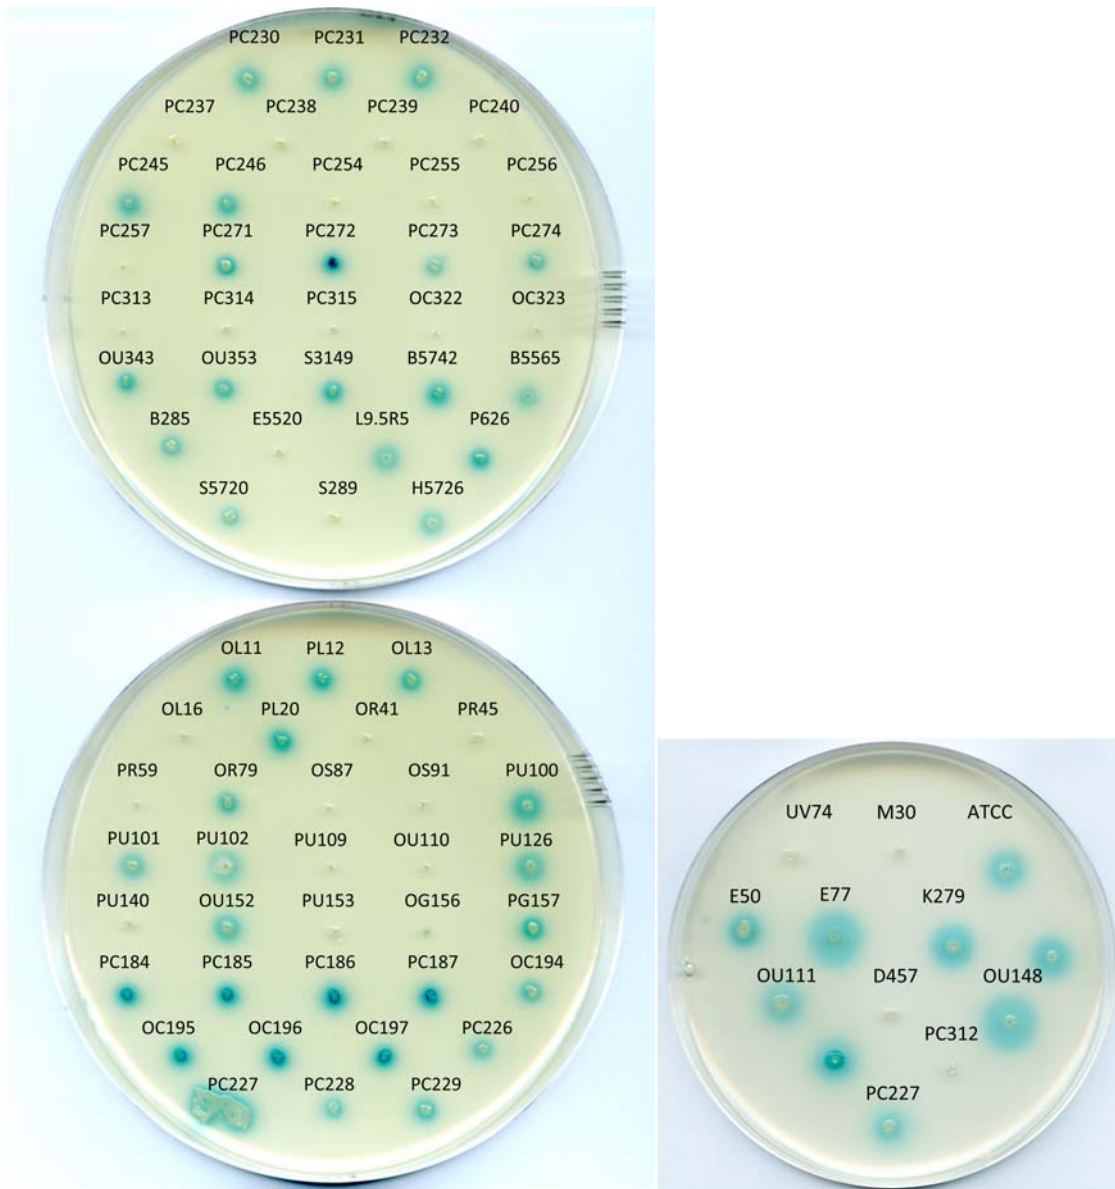

**FIG S1** Colony DSF bioassay of 78 *S. maltophilia* strains. Blue halo around the colony indicates DSF activity and corresponded to RpfF-1 variant strains. Colonies without DSF production corresponded to RpfF-2 variant strains.

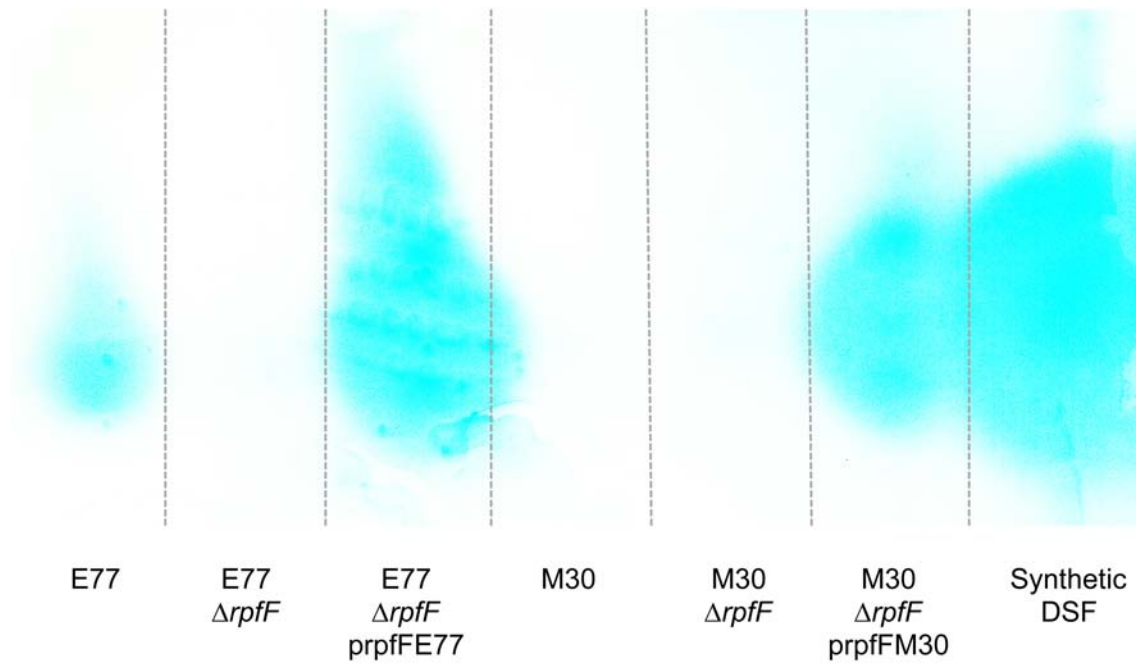

**FIG S2** TLC coupled to DSF bioassay of culture supernatants from E77 and M30 with their respective *rpfF* mutants and complemented strains.

A

File : \\5973ms\D\data\13EM287 - Huedo\13EM287\_1\_2.D  
Operator : MBR/Huedo  
Acquired : 19 Nov 2013 17:08 using AcqMethod 13EM287-1.M  
Instrument : 5973N  
Sample Name : 13EM287-2  
Misc Info :  
Vial Number : 2

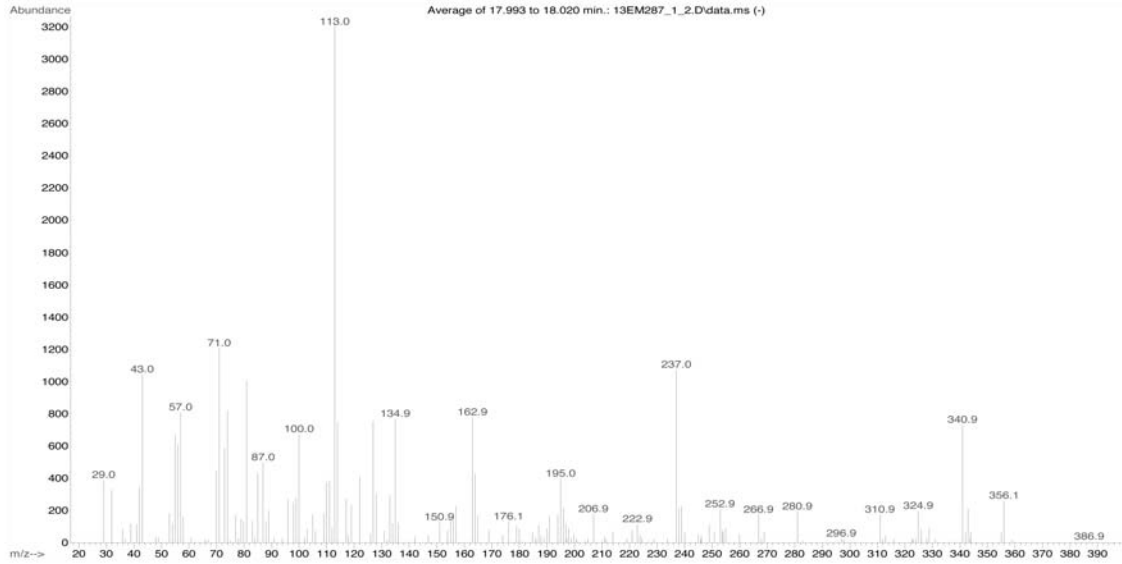

B

File : \\5973ms\D\data\13EM287 - Huedo\13EM287\_1\_3.D  
Operator : MBR/Huedo  
Acquired : 19 Nov 2013 18:06 using AcqMethod 13EM287-1.M  
Instrument : 5973N  
Sample Name : 13EM287-3  
Misc Info :  
Vial Number : 3

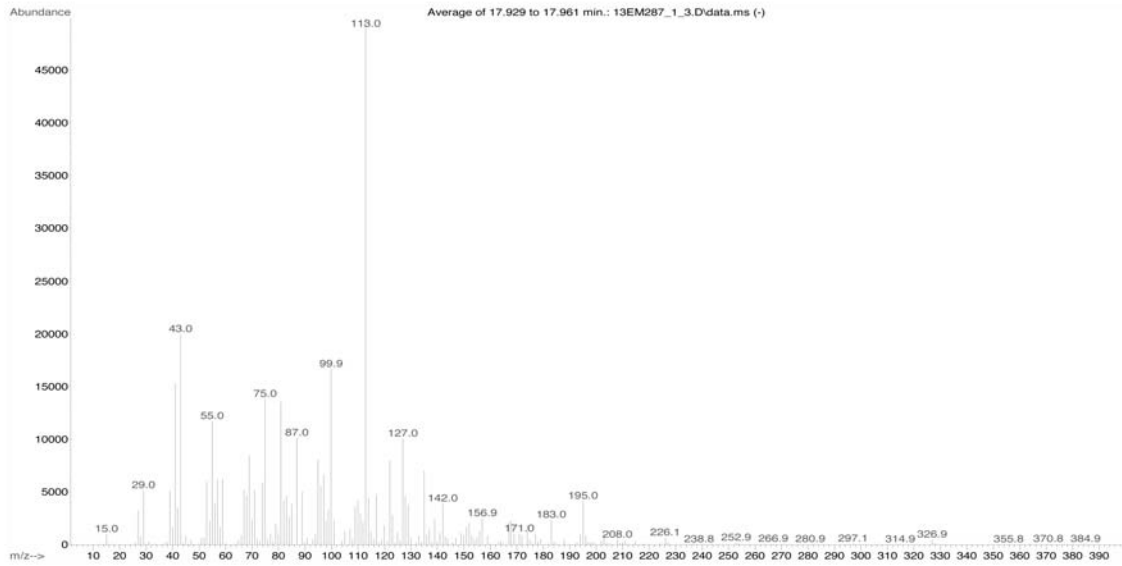

C

File : \\5973ms\D\data\13EM287 - Huedo\13EM287\_1\_6.D  
Operator : MBR/Huedo  
Acquired : 19 Nov 2013 21:00 using AcqMethod 13EM287-1.M  
Instrument : 5973N  
Sample Name : 13EM287-6  
Misc Info :  
Vial Number : 6

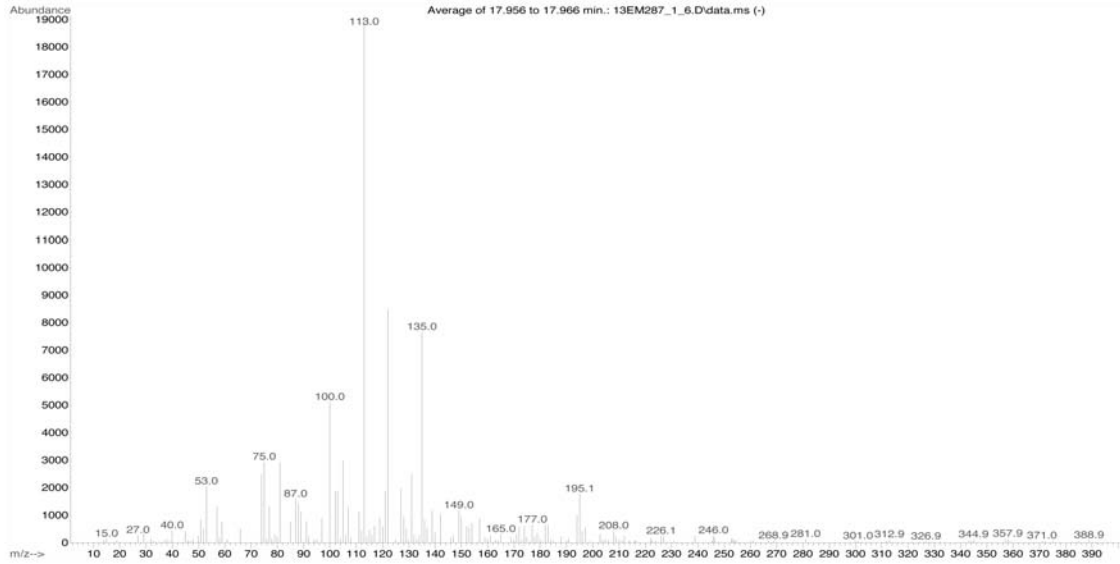

D

File : \\5973ms\D\data\13EM287 - Huedo\13EM287\_1\_7.D  
Operator : MBR/Huedo  
Acquired : 19 Nov 2013 21:58 using AcqMethod 13EM287-1.M  
Instrument : 5973N  
Sample Name : 13EM287-7  
Misc Info :  
Vial Number : 7

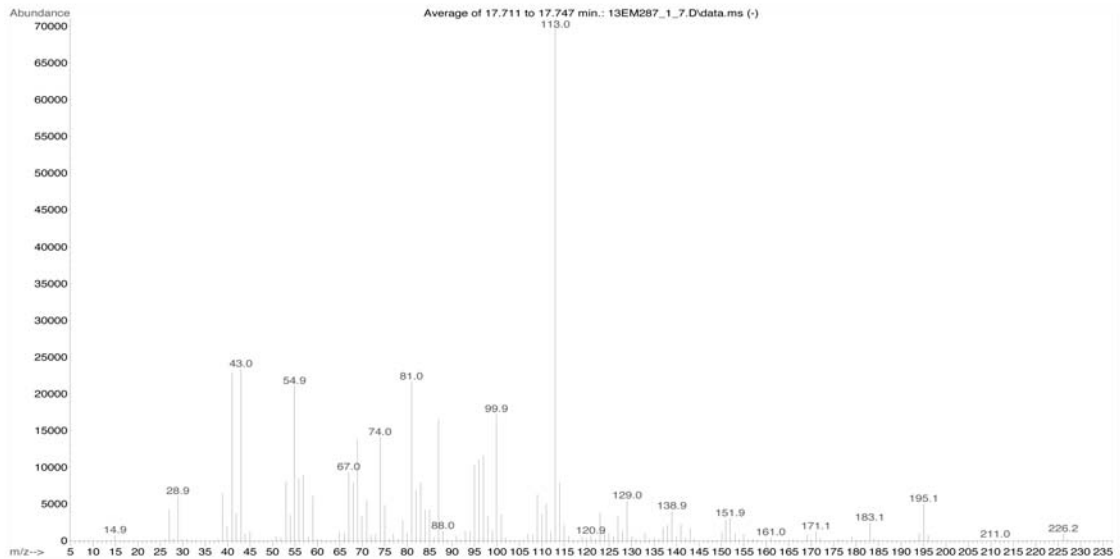

**FIG S3** Mass spectra of the Gas Chromatography peaks with DSF activity (17,9 min.) (see also Fig. 4). (A) E77, (B) E77  $\Delta$ *rpfF* prpfFE77, (C) M30  $\Delta$ *rpfF* prpfFM30 and (D) Synthetic DSF.

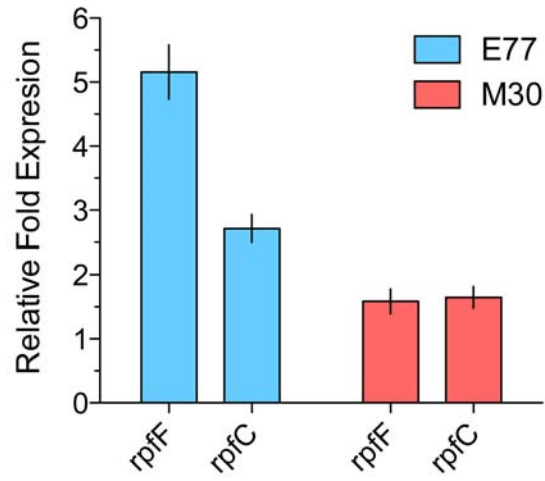

**FIG S4** Quantification of gene expression of *rpfF* and *rpfC* from strains E77 and M30 normalized with the gene expression of the housekeeping gene *gyrA*, using the  $2^{-\Delta\Delta Ct}$  method.

TABLE S1. *S. maltophilia* clinical isolates used in this study

| Strain | RpfF Variant | Source     | Hospital                                                      | Country |
|--------|--------------|------------|---------------------------------------------------------------|---------|
| OL11   | 1            | Oropharynx | Ljubljana Medical Center                                      | SLO     |
| PL12   | 1            | Perineum   | Ljubljana Medical Center                                      | SLO     |
| OL13   | 1            | Oropharynx | Ljubljana Medical Center                                      | SLO     |
| OL16   | 2            | Oropharynx | Ljubljana Medical Center                                      | SLO     |
| PL20   | 1            | Perineum   | Ljubljana Medical Center                                      | SLO     |
| OR41   | 2            | Oropharynx | Hopital Raymond Poincare, Paris                               | FRA     |
| PR45   | 2            | Perineum   | Hopital Raymond Poincare, Paris                               | FRA     |
| PR59   | 2            | Perineum   | Hopital Raymond Poincare, Paris                               | FRA     |
| OR79   | 1            | Oropharynx | Hopital Raymond Poincare, Paris                               | FRA     |
| OS87   | 2            | Oropharynx | Hopital St Joseph, Paris                                      | FRA     |
| OS91   | 2            | Oropharynx | Hopital St Joseph, Paris                                      | FRA     |
| PU100  | 1            | Perineum   | University of Antwerp                                         | BEL     |
| PU101  | 1            | Perineum   | University of Antwerp                                         | BEL     |
| PU102  | 1            | Oropharynx | University of Antwerp                                         | BEL     |
| PU109  | 2            | Perineum   | University of Antwerp                                         | BEL     |
| OU110  | 2            | Oropharynx | University of Antwerp                                         | BEL     |
| OU111  | 1            | Oropharynx | University of Antwerp                                         | BEL     |
| PU140  | 2            | Perineum   | University of Antwerp                                         | BEL     |
| OU141  | 2            | Oropharynx | University of Antwerp                                         | BEL     |
| OU148  | 1            | Oropharynx | University of Antwerp                                         | BEL     |
| OU152  | 1            | Oropharynx | University of Antwerp                                         | BEL     |
| PU153  | 2            | Perineum   | University of Antwerp                                         | BEL     |
| OG156  | 2            | Oropharynx | University Clinic of Respiratory and Allergic Disease, Golnik | SLO     |
| PG157  | 1            | Perineum   | University Clinic of Respiratory and Allergic Disease, Golnik | SLO     |
| PC184  | 1            | Perineum   | ChariteClinic, Berlin                                         | GER     |
| PC185  | 1            | Perineum   | ChariteClinic, Berlin                                         | GER     |
| PC186  | 1            | Perineum   | ChariteClinic, Berlin                                         | GER     |
| PC187  | 1            | Perineum   | ChariteClinic, Berlin                                         | GER     |
| OC194  | 1            | Oropharynx | ChariteClinic, Berlin                                         | GER     |
| OC195  | 1            | Oropharynx | ChariteClinic, Berlin                                         | GER     |
| OC196  | 1            | Oropharynx | ChariteClinic, Berlin                                         | GER     |
| OC197  | 1            | Oropharynx | ChariteClinic, Berlin                                         | GER     |
| PC226  | 1            | Perineum   | ChariteClinic, Berlin                                         | GER     |
| PC227  | 1            | Perineum   | ChariteClinic, Berlin                                         | GER     |
| PC228  | 1            | Perineum   | ChariteClinic, Berlin                                         | GER     |
| PC229  | 1            | Perineum   | ChariteClinic, Berlin                                         | GER     |
| PC230  | 1            | Perineum   | ChariteClinic, Berlin                                         | GER     |
| PC231  | 1            | Perineum   | ChariteClinic, Berlin                                         | GER     |
| PC232  | 1            | Perineum   | ChariteClinic, Berlin                                         | GER     |
| PC237  | 2            | Perineum   | ChariteClinic, Berlin                                         | GER     |
| PC238  | 2            | Perineum   | ChariteClinic, Berlin                                         | GER     |
| PC239  | 2            | Perineum   | ChariteClinic, Berlin                                         | GER     |
| PC240  | 2            | Perineum   | ChariteClinic, Berlin                                         | GER     |
| PC245  | 1            | Perineum   | ChariteClinic, Berlin                                         | GER     |
| PC246  | 1            | Perineum   | ChariteClinic, Berlin                                         | GER     |
| PC254  | 2            | Perineum   | ChariteClinic, Berlin                                         | GER     |
| PC255  | 2            | Perineum   | ChariteClinic, Berlin                                         | GER     |
| PC256  | 2            | Perineum   | ChariteClinic, Berlin                                         | GER     |
| PC257  | 2            | Perineum   | ChariteClinic, Berlin                                         | GER     |
| PC271  | 1            | Perineum   | ChariteClinic, Berlin                                         | GER     |
| PC272  | 1            | Perineum   | ChariteClinic, Berlin                                         | GER     |
| PC273  | 1            | Perineum   | ChariteClinic, Berlin                                         | GER     |
| PC274  | 1            | Perineum   | ChariteClinic, Berlin                                         | GER     |
| PC312  | 2            | Perineum   | ChariteClinic, Berlin                                         | GER     |
| PC313  | 2            | Perineum   | ChariteClinic, Berlin                                         | GER     |
| PC314  | 2            | Perineum   | ChariteClinic, Berlin                                         | GER     |
| PC315  | 2            | Perineum   | ChariteClinic, Berlin                                         | GER     |
| OC322  | 2            | Oropharynx | ChariteClinic, Berlin                                         | GER     |
| OC323  | 2            | Oropharynx | ChariteClinic, Berlin                                         | GER     |

|           |   |                       |                                                        |     |
|-----------|---|-----------------------|--------------------------------------------------------|-----|
| OU343     | 1 | Oropharinx            | University of Antwerp                                  | BEL |
| OU353     | 1 | Oropharinx            | University of Antwerp                                  | BEL |
| ATCC13637 | 1 | Collection            | ATCC                                                   | USA |
| UV74      | 2 | Vascular Ulcera       | Hospital Municipal de Badalona                         | ESP |
| L9.5R5    | 1 | (1)                   | Hospital Clínic de Barcelona                           | ESP |
| 4834-R    | 2 | (2)                   | Hospital Clínic de Barcelona                           | ESP |
| D457      | 2 | (3)                   | (3)                                                    | ESP |
| K279      | 1 | Blood Infection       | (4)                                                    | GBR |
| E77       | 1 | Sputum                | Hospital Municipal Badalona                            | ESP |
| E50       | 1 | Sputum                | Hospital Municipal Badalona                            | ESP |
| M30       | 2 | Decubitus ulcer       | Hospital Municipal Badalona                            | ESP |
| S3149     | 1 | Surgical wound        | Hospital Universitari Germans Trias i Pujol, Barcelona | ESP |
| P626      | 1 | Oropharinx            | Hospital Universitari Germans Trias i Pujol, Barcelona | ESP |
| P815      | 1 | Oropharinx            | Hospital Universitari Germans Trias i Pujol, Barcelona | ESP |
| E5520     | 2 | Environmental control | Hospital Universitari Germans Trias i Pujol, Barcelona | ESP |
| B5565     | 1 | Bronchitis            | Hospital Universitari Germans Trias i Pujol, Barcelona | ESP |
| S5720     | 1 | Sputum                | Hospital Universitari Germans Trias i Pujol, Barcelona | ESP |
| H5726     | 1 | Hematologic neoplasia | Hospital Universitari Germans Trias i Pujol, Barcelona | ESP |
| S289      | 2 | Sputum                | Hospital Universitari Germans Trias i Pujol, Barcelona | ESP |
| B285      | 1 | Bronchitis exudate    | Hospital Universitari Germans Trias i Pujol, Barcelona | ESP |
| B5742     | 1 | Bronchitis exudate    | Hospital Universitari Germans Trias i Pujol, Barcelona | ESP |

TABLE S2. Strains used in mutant generation, complementation and DSF bioassay

| Strains                                             | Relevant characteristics                                                                                     | Reference      |
|-----------------------------------------------------|--------------------------------------------------------------------------------------------------------------|----------------|
| <i>Stenotrophomonas maltophilia</i>                 |                                                                                                              |                |
| E77 $\Delta rpfF$                                   | E77 $\Delta rpfF$ mutant, <i>Erm<sup>r</sup></i>                                                             | This work      |
| E77 prpfFE77                                        | E77 wild type harboring prpfFE77, <i>Cm<sup>r</sup></i>                                                      | This work      |
| E77 pBBR1MCS1-Cm                                    | E77 wild type harboring pBBR1MCS1-Cm <i>Cm<sup>r</sup></i>                                                   | This work      |
| E77 $\Delta rpfF$ pBBR1MCS1-Cm                      | E77 $\Delta rpfF$ harboring pBBR1MCS1 <i>Erm<sup>r</sup> Cm<sup>r</sup></i>                                  | This work      |
| E77 $\Delta rpfF$ prpfFE77                          | E77 $\Delta rpfF$ harboring prpfFE77 <i>Erm<sup>r</sup> Cm<sup>r</sup></i>                                   | This work      |
| E77 $\Delta rpfF$ prpfFM30                          | E77 $\Delta rpfF$ harboring prpfFM30 <i>Erm<sup>r</sup> Cm<sup>r</sup></i>                                   | This work      |
| E77 prpfGCE77                                       | E77 wild type harboring prpfGCE77, <i>Cm<sup>r</sup></i>                                                     | This work      |
| E77 prpfGCM30                                       | E77 wild type harboring prpfGCM30, <i>Cm<sup>r</sup></i>                                                     | This work      |
| M30 $\Delta rpfF$                                   | M30 $\Delta rpfF$ mutant, <i>Erm<sup>r</sup></i>                                                             | This work      |
| M30 prpfFM30                                        | M30 wild type harboring prpfFM30, <i>Cm<sup>r</sup></i>                                                      | This work      |
| M30 pBBR1MCS1-Cm                                    | M30 wild type harboring pBBR1MCS1-Cm <i>Cm<sup>r</sup></i>                                                   | This work      |
| M30 $\Delta rpfF$ pBBR1MCS1-Cm                      | M30 $\Delta rpfF$ harboring pBBR1MCS1 <i>Erm<sup>r</sup> Cm<sup>r</sup></i>                                  | This work      |
| M30 $\Delta rpfF$ prpfM30                           | M30 $\Delta rpfF$ harboring prpfM30 <i>Erm<sup>r</sup> Cm<sup>r</sup></i>                                    | This work      |
| M30 $\Delta rpfF$ prpfFE77                          | M30 $\Delta rpfF$ harboring prpfFE77 <i>Erm<sup>r</sup> Cm<sup>r</sup></i>                                   | This work      |
| M30 $\Delta rpfC$                                   | M30 $\Delta rpfC$ mutant, <i>Erm<sup>r</sup></i>                                                             | This work      |
| M30 $\Delta rpfC$ prpfGCE77                         | M30 $\Delta rpfC$ wild type harboring prpfGCE77, <i>Cm<sup>r</sup></i>                                       | This work      |
| M30 $\Delta rpfC$ prpfGCM30                         | M30 $\Delta rpfC$ wild type harboring prpfGCM30, <i>Cm<sup>r</sup></i>                                       | This work      |
| <i>Escherichia coli</i>                             |                                                                                                              |                |
| DH5 $\alpha$                                        | <i>fhuA2 lac(del)U169 phoA glnV44<math>\Phi</math>80' lacZ(del)M15 gyrA96 recA1 relA1 endA1 thi-1 hsdR17</i> | Lab collection |
| DH5 $\alpha$ pEX18Tc                                | DH5 $\alpha$ harboring suicide vector pEX18Tc, <i>Tc<sup>r</sup></i>                                         | Lab collection |
| DH5 $\alpha$ pGEM- <i>rpfFE77</i> UP                | DH5 $\alpha$ harboring pGEM- <i>rpfFE77</i> UP, <i>Ap<sup>r</sup></i>                                        | This work      |
| DH5 $\alpha$ pGEM- <i>rpfFE77</i> DW                | DH5 $\alpha$ harboring pGEM- <i>rpfFE77</i> DW, <i>Ap<sup>r</sup></i>                                        | This work      |
| DH5 $\alpha$ pEXE77 <i>rpfF</i>                     | DH5 $\alpha$ harboring suicide vector pEXE77 <i>rpfF</i> <i>Tc<sup>r</sup>, Erm<sup>r</sup></i>              | This work      |
| DH5 $\alpha$ prpfFE77                               | DH5 $\alpha$ harboring prpfFE77                                                                              | This work      |
| DH5 $\alpha$ pGEM- <i>rpfFM30</i> UP                | DH5 $\alpha$ harboring pGEM- <i>rpfFM30</i> UP                                                               | This work      |
| DH5 $\alpha$ pGEM- <i>rpfFM30</i> DW                | DH5 $\alpha$ harboring pGEM- <i>rpfFM30</i> DW                                                               | This work      |
| DH5 $\alpha$ prpfFM30                               | DH5 $\alpha$ harboring prpfFM30                                                                              | This work      |
| DH5 $\alpha$ prpfFE77                               | DH5 $\alpha$ harboring prpfFE77                                                                              | This work      |
| DH5 $\alpha$ pEXM30 <i>rpfC</i>                     | DH5 $\alpha$ harboring suicide vector pEXM30 <i>rpfC</i> <i>Tc<sup>r</sup>, Erm<sup>r</sup></i>              | This work      |
| DH5 $\alpha$ prpfGCM30                              | DH5 $\alpha$ harboring prpfGCM30                                                                             | This work      |
| DH5 $\alpha$ prpfGCE77                              | DH5 $\alpha$ harboring prpfGCE77                                                                             | This work      |
| DH5 $\alpha$ pEXM30 <i>rpfF</i>                     | DH5 $\alpha$ harboring pEXM30 <i>rpfF</i>                                                                    | This work      |
| OP50                                                | Non-pathogenic strain, <i>C. elegans</i> maintenance                                                         | C.G.C.         |
| <i>Xanthomonas campestris</i> pv. <i>campestris</i> |                                                                                                              |                |
| <i>Xcc</i> 8523 pL6engGUS                           | <i>rpfF</i> mutant, DSF reporter strain, carrying plasmid pL6engGUS, <i>Tc<sup>r</sup>, Kan<sup>r</sup></i>  | (5)            |



TABLE S3. Primers used in this study

| Primer                              | Sequence 5'-3'                  | Restriction Site |
|-------------------------------------|---------------------------------|------------------|
| <i>Erythromycin resistance gene</i> |                                 |                  |
| P5Erm                               | GGATCCGAAACGTAAAAGAAGTTATG      | BamHI            |
| P3Erm                               | GGATCCTACAAATTCCTCCGTAGGC       | BamHI            |
| P5Ermrev                            | GATACTGCACTATCAACACAC           | -                |
| P3Ermrev                            | CTTCCAAGGAGCTAAAGAGGT           | -                |
| <i>rpfF determination</i>           |                                 |                  |
| PrpfFtypeUp                         | GCAGAAGACCAACGTCCGGCAAG         | -                |
| PrpfFtypeDw                         | CTTCCTAGGCGACGATGGTGTG          | -                |
| <i>qRT-PCR</i>                      |                                 |                  |
| P1rpfC-RT                           | GTTCCGCACGCCGTTGAA              | -                |
| P2rpfC-RT                           | CGAGGCCTGGATGGTGT               | -                |
| P1rpfF-RT                           | CTGAGCTGCCACACCATC              | -                |
| P2rpfF-RT                           | GAACAGCACCTCCGGCAG              | -                |
| P1gyrA-RT                           | GTCGACGGCCAGGGTAAC              | -                |
| P2gyrA-RT                           | GCCTCGGTGTATCGCATT              | -                |
| <i>E77</i>                          |                                 |                  |
| P1E77rpfFUp                         | GGATCCAGTTCTCCGTGTGACCGTCC      | HindIII          |
| P2E77rpfFUp                         | AAGCTTCGAGGACGTCATCGCGATGAT     | BamHI            |
| P3E77rpfFDw                         | GAATTCTGGGCATGGGCGATGGCTTC      | BamHI            |
| P4E77rpfFDw                         | GGATCCTCGTCTGGCGGGTCAGGACG      | EcoRI            |
| P1DemRpfFE77                        | TCGACCGCAAGAAGGACATGA           | -                |
| P2DemRpfFE77                        | TCGGCGATGGCGTGCTCGATA           | -                |
| PrprpfFE77FUp                       | AAGCTTCGTGAAGGTCGTGATCGTGAAGAA  | HindIII          |
| PrprpfFE77FDw                       | TCTAGAACGATCAGGCCGGGTCGCCAT     | XbaI             |
| P1RpfFE77FInt                       | TGGTCGACATTCGTTGATACAC          | -                |
| P2RpfFE77FInt                       | GCACGTCCTGTACCCGCAT             | -                |
| P1rpfGCE77                          | ATCAAGCTTTGCTGCTGTTCCCGTACAT    | HindIII          |
| P2rpfGCE77                          | CATCTAGATCTGGGTAGACACTGCGATG    | XbaI             |
| <i>M30</i>                          |                                 |                  |
| P1M30rpfFUp                         | GCGGATCCAACGGTCCACACACGCGG      | XbaI             |
| P2M30rpfFUp                         | CATCTAGATGGTGTCCGGCTTCAACG      | BamHI            |
| P3M30rpfFDw                         | CTGAATTCCTGGCTTCGCTGGGCAT       | BamHI            |
| P4M30rpfFDw                         | CCGGATCCCAGCGCGCTTCACCATCA      | EcoRI            |
| P1DemRpfFM30                        | ATCCAGCGCTGTACTIONCAG           | -                |
| P2DemRpfFM30                        | CAGGTGATGAAGGGCTACT             | -                |
| PrprpfFM30Up                        | GCCAAGCTTGGGTTTGCGGCAATCTGGACAG | HindIII          |
| PrprpfFM30Dw                        | GGTCTAGACGATGATGGTGAAGCGCGCTGA  | XbaI             |
| P1RpfFM30Int                        | GCCATGCGTCTGACAT                | -                |
| P2RpfFM30Int                        | AGACAATACTTGCTCAT               | -                |
| P1M30rpfCUp                         | AGGAATCCCAGAATCGCTTCATCCAGGT    | EcoRI            |
| P2M30rpfCUp                         | GCGGATCCAGCTGCGACAACAGGCGTTTC   | BamHI            |
| P3M30rpfCDw                         | ACGGATCCTGATGGTGAAGCGCGCTGA     | BamHI            |
| P4M30rpfCDw                         | GCTCTAGACCCCATCTGGCCGAGAAGA     | XbaI             |
| P1DemRpfCM30                        | GAGGAAGAGCTGGCGATCAT            | -                |

|              |                               |         |
|--------------|-------------------------------|---------|
| P2DemRpfCM30 | GCGACCTCCTGCTGAACTAC          | -       |
| P1prpfGCM30  | GTCAAGCTTGATCCGCGATGTACTGCTGT | HindIII |
| P2rpfGCM30   | TCGTCTAGAAGTCTCGACGCGGCCTGATT | XbaI    |
| P1rpfCM30int | ATCGGTCTGATCCTGTTGCCA         | -       |
| P2rpfCM30int | TTCCAGATAGCCGATGTCACC         | -       |

---

TABLE S4. Plasmids used in this study

| Plasmids                | Relevant Characteristics                                                                                                                            | Reference       |
|-------------------------|-----------------------------------------------------------------------------------------------------------------------------------------------------|-----------------|
| pL6engGUS               | DSF reporter plasmid, transcriptional fusion <i>engXCA::gus</i> , <i>Tc<sup>r</sup></i> , <i>Kan<sup>r</sup></i>                                    | (5)             |
| pEX18Tc                 | Suicide allelic exchange vector; <i>Tc<sup>r</sup></i>                                                                                              | (6)             |
| pBBR1MCS1Cm             | Broad-host-range cloning vector, <i>Cm<sup>r</sup></i>                                                                                              | (7)             |
| pGEM-T Easy Vector      | Cloning vector, <i>Ap<sup>r</sup></i>                                                                                                               | PROMEGA         |
| pEX18TcErm              | pEX18Tc carrying <i>Erm</i> resistance gene, <i>Erm<sup>r</sup></i> , <i>Tc<sup>r</sup></i>                                                         | Lab. collection |
| pGEM-Erm                | pGEM-T carrying <i>Erm</i> resistance gene <i>Erm<sup>r</sup></i> , <i>Tc<sup>r</sup></i>                                                           | Lab. collection |
| pGEM- <i>rpfFE77FUP</i> | Cloning vector, carrying E77F <i>rpfF</i> upstream flanking region, <i>Ap<sup>r</sup></i>                                                           | This work       |
| pGEM- <i>rpfFE77FDW</i> | Cloning vector, carrying E77F <i>rpfF</i> downstream flanking region, <i>Ap<sup>r</sup></i>                                                         | This work       |
| pEXE77 <i>rpfF</i>      | pEX18Tc suicide vector, carrying E77F <i>rpfF</i> flanking regions interrupted with <i>Erm</i> gene, <i>Tc<sup>r</sup></i> , <i>Erm<sup>r</sup></i> | This work       |
| prpfFE77F               | Complementation vector, pBBR1MCS1Cm carrying <i>rpfF</i> promoter and its ORF from E77F strain, <i>Cm<sup>r</sup></i>                               | This work       |
| pGEM- <i>rpfFM30UP</i>  | Cloning vector, carrying M30 <i>rpfF</i> upstream flanking region, <i>Ap<sup>r</sup></i>                                                            | This work       |
| pGEM- <i>rpfFM30DW</i>  | Cloning vector, carrying M30 <i>rpfF</i> downstream flanking region, <i>Ap<sup>r</sup></i>                                                          | This work       |
| pEXM30 <i>rpfF</i>      | pEX18Tc suicide vector, carrying M30 <i>rpfF</i> flanking regions interrupted with <i>Erm</i> gene, <i>Tc<sup>r</sup></i> , <i>Erm<sup>r</sup></i>  | This work       |
| prpfFM30                | Complementation vector, pBBR1MCS1Cm carrying <i>rpfF</i> promoter and its ORF from M30 strain, <i>Cm<sup>r</sup></i>                                | This work       |
| pEXM30 <i>rpfC</i>      | pEX18Tc suicide vector, carrying M30 <i>rpfC</i> flanking regions interrupted with <i>Erm</i> gene, <i>Tc<sup>r</sup></i> , <i>Erm<sup>r</sup></i>  | This work       |
| prpfGCM30               | Complementation vector, pBBR1MCS1Cm carrying <i>rpfGC</i> operon from M30 strain, <i>Cm<sup>r</sup></i>                                             | This work       |
| prpfGCE77               | Complementation vector, pBBR1MCS1Cm carrying <i>rpfGC</i> operon from E77 strain, <i>Cm<sup>r</sup></i>                                             | This work       |

## REFERENCES

1. **Ribera A, Ruiz J, Jimenez de Anta MT, Vila J.** 2002. Effect of an efflux pump inhibitor on the MIC of nalidixic acid for *Acinetobacter baumannii* and *Stenotrophomonas maltophilia* clinical isolates. *J. Antimicrob. Chemother.* **49**:697–698.
2. **Ribera A, Jurado A, Ruiz J, Marco F, Del Valle O, Mensa J, Chaves J, Hernández G, Jiménez de Anta MT, Vila J.** 2002. In vitro activity of clinafloxacin in comparison with other quinolones against *Stenotrophomonas maltophilia* clinical isolates in the presence and absence of reserpine. *Diagn. Microbiol. Infect. Dis.* **42**:123–128.
3. **Alonso A, Martínez JL.** 1997. Multiple antibiotic resistance in *Stenotrophomonas maltophilia*. *Antimicrob. Agents Chemother.* **41**:1140–1142.
4. **Fouhy Y, Scanlon K, Schouest K, Spillane C, Crossman L, Avison MB, Ryan RP, Dow JM.** 2007. Diffusible signal factor-dependent cell-cell signaling and virulence in the nosocomial pathogen *Stenotrophomonas maltophilia*. *J. Bacteriol.* **189**:4964–4968.
5. **Slater H, Alvarez-Morales A, Barber CE, Daniels MJ, Dow JM.** 2000. A two-component system involving an HD-GYP domain protein links cell-cell signalling to pathogenicity gene expression in *Xanthomonas campestris*. *Mol. Microbiol.* **38**:986–1003.
6. **Hoang TT, Karkhoff-Schweizer RR, Kutchma AJ, Schweizer HP.** 1998. A broad-host-range F<sub>1</sub>-FRT recombination system for site-specific excision of chromosomally-located DNA sequences: application for isolation of unmarked *Pseudomonas aeruginosa* mutants. *Gene* **212**:77–86.
7. **Kovach ME, Phillips RW, Elzer PH, Roop RM 2nd, Peterson KM.** 1994. pBBR1MCS: a broad-host-range cloning vector. *BioTechniques* **16**:800–802.
